# Supplementary material for: A Quasi-Intramolecular Solid-Phase Redox Reaction of Ammonia Ligands and Perchlorate Anion in Diamminesilver(I) Perchlorate
Source: MDPI journal article supplement (doi:10.3390/inorganics9050038), 2021-05-09
Supplement: s1 [file s1]

# **Supplementary Material: A quasi-intramolecular solid-phase redox reaction of ammonia ligands and perchlorate anion in diamminesilver(I) perchlorate**

Lara Alexandre Fogaca<sup>1,2</sup>, Laura Bereczki<sup>1</sup>, Vladimir Petruševski<sup>3</sup>, Berta Barta-Holló<sup>4</sup>, Fernanda Paiva Franguelli<sup>1,2</sup>, Miklós Mohai<sup>1</sup>, Kende Attila Béres<sup>1</sup>, Istvan E Sajó<sup>5</sup>, Imre Miklós Szilágyi<sup>2</sup> and László Kótai<sup>1,6</sup>

1 Research Centre for Natural Sciences, Institute of Materials and Environmental Chemistry, Magyar Tudósok krt 2, Budapest, 1117, Hungary

2 Department of Inorganic and Analytical Chemistry, Budapest University of Technology and Economics, Muegyetem rakpart 3, Budapest, H-1111, Hungary

3 Faculty of Natural Sciences and Mathematics, Ss. Cyril and Methodius University, Skopje, Macedonia

4 University of Novi Sad, Trg Dositeja Obradovi'ca 3, Novi Sad, 21000, Serbia

5 University of Pécs, Ifjúság útja 20, Pécs, H-7624, Hungary

6 Deuton-X Ltd, Selmec u. 89, Érd, H-2030, Hungary,

\* Correspondence: kotai.laszlo@ttk.hu

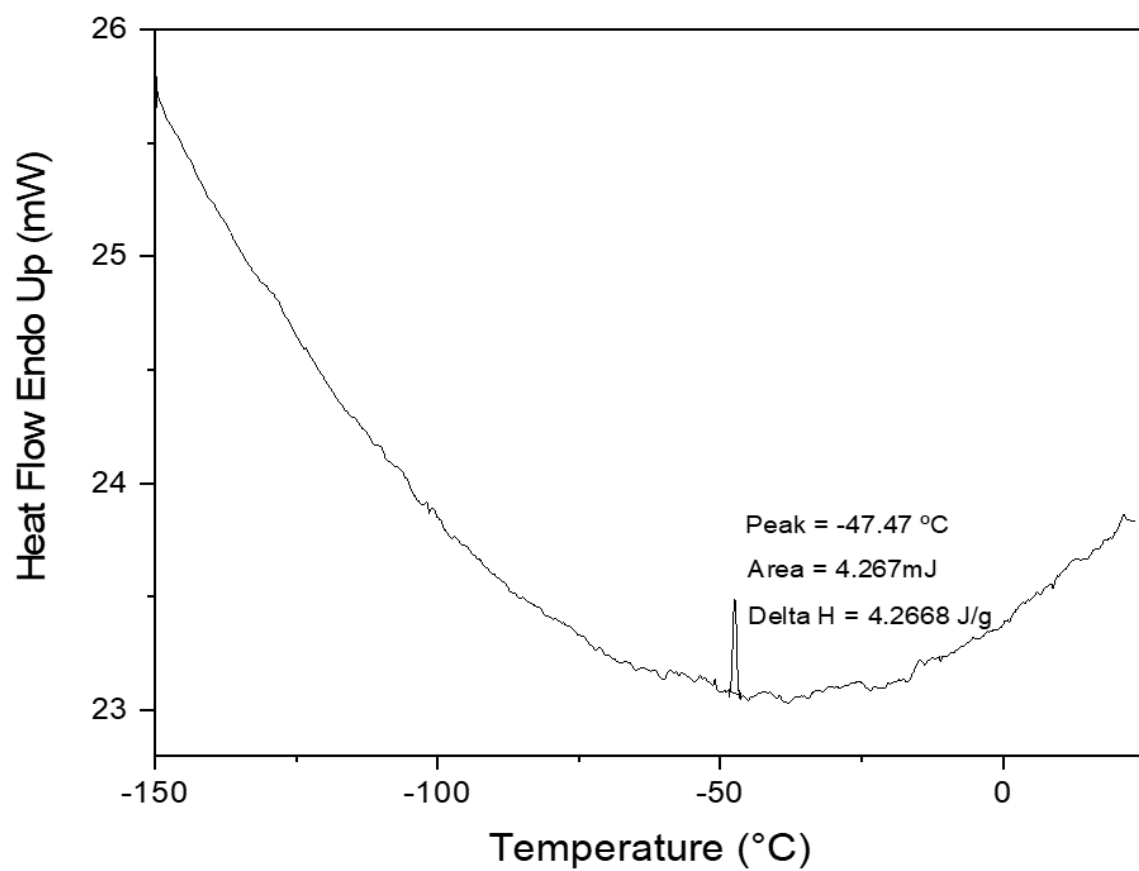

**Figure S1** Cryogenic DSC results of  $[\text{Ag}(\text{NH}_3)_2]\text{ClO}_4$

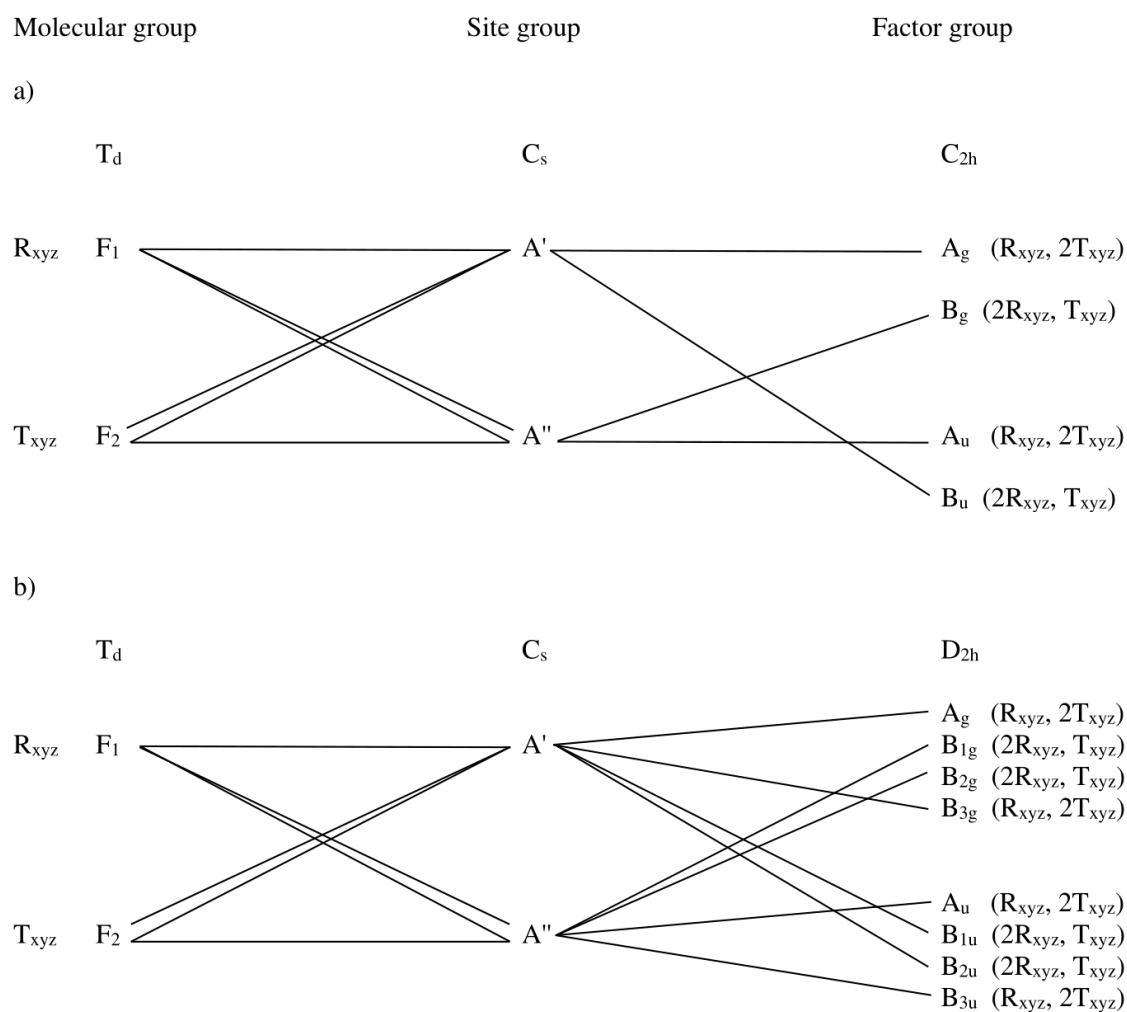

**Figure S2 (a) and (b)** The hindered rotations ( $R_{xyz}$ )( $F_1$ ) and translations ( $T_{xyz}$  ( $F_2$ )) of perchlorate ion in the polymorphs of  $[Ag(NH_3)_2]ClO_4$

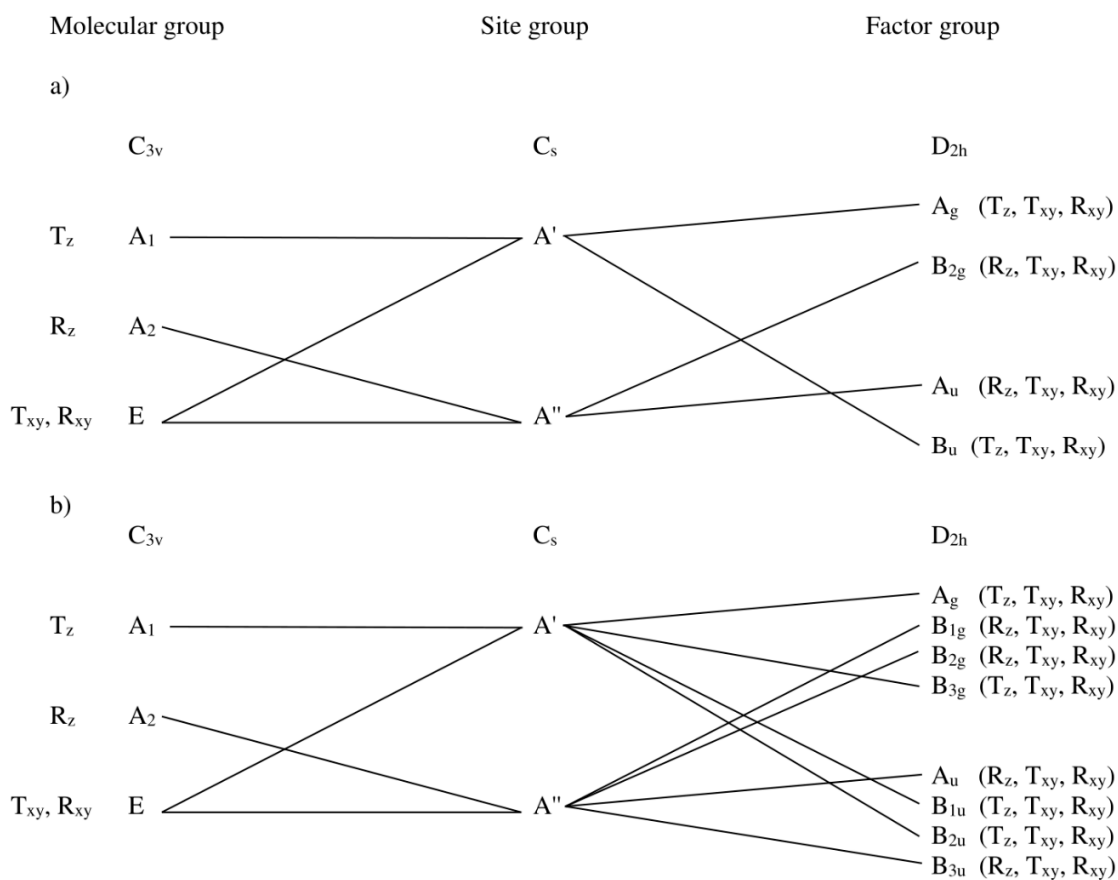

**Figure S3(a) and (b)** External vibrational modes ( $T_z(A_1)$ ,  $R_z(A_2)$  and  $T_{xy}(E)$  or  $R_{xy}(E)$ ) for ammonia in the polymorphs of  $[Ag(NH_3)_2]ClO_4$

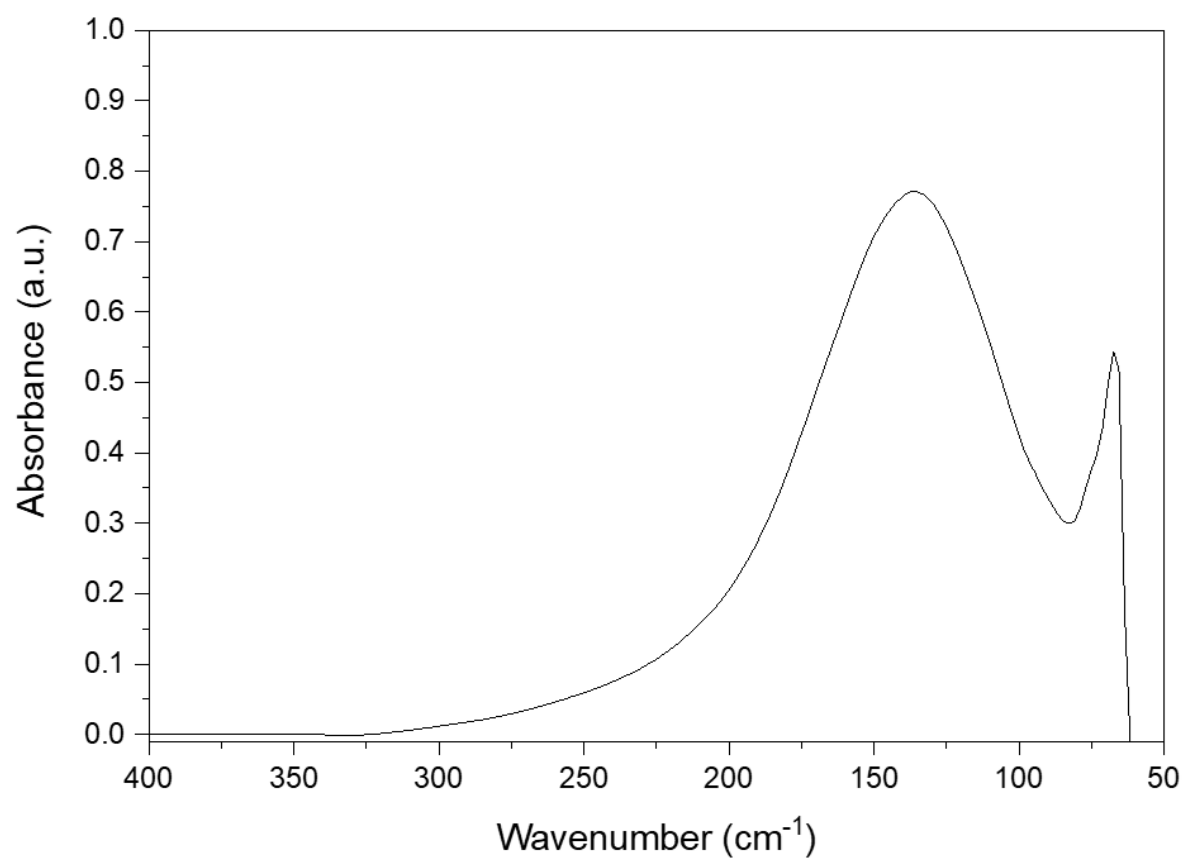

**Figure S4** The far-IR spectra of compound **1-O**

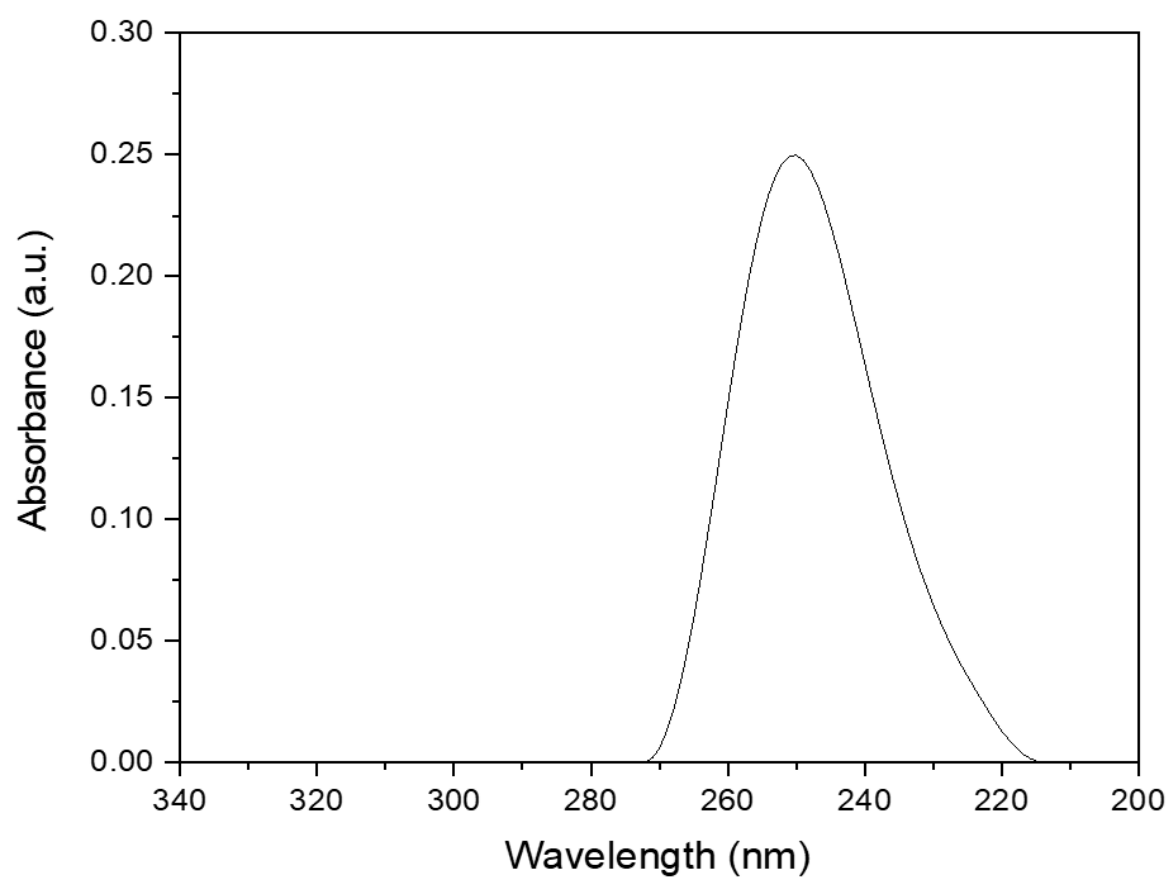

**Figure S5** The UV spectra of complex **1**

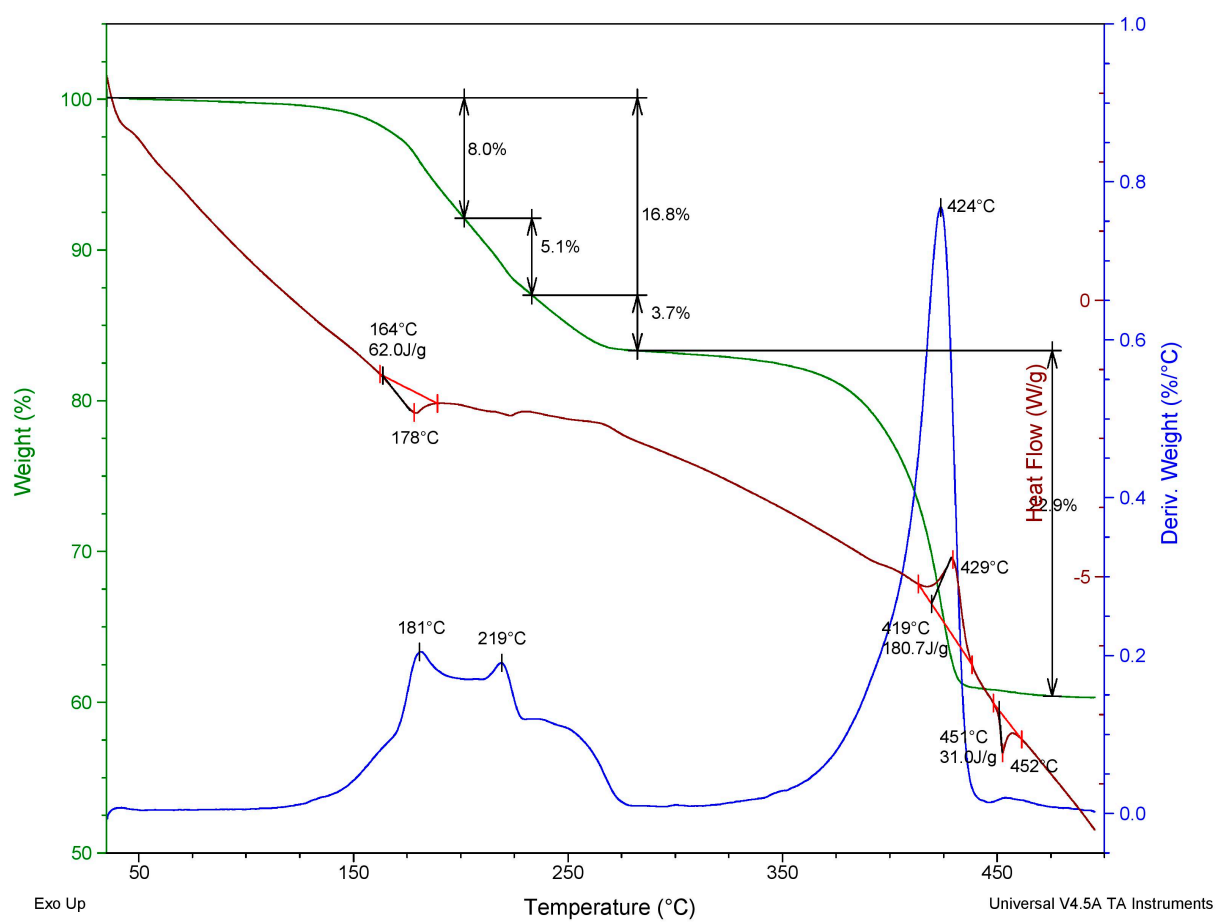

**Figure S6** TG-DTG-DSC results of compound **1** in air

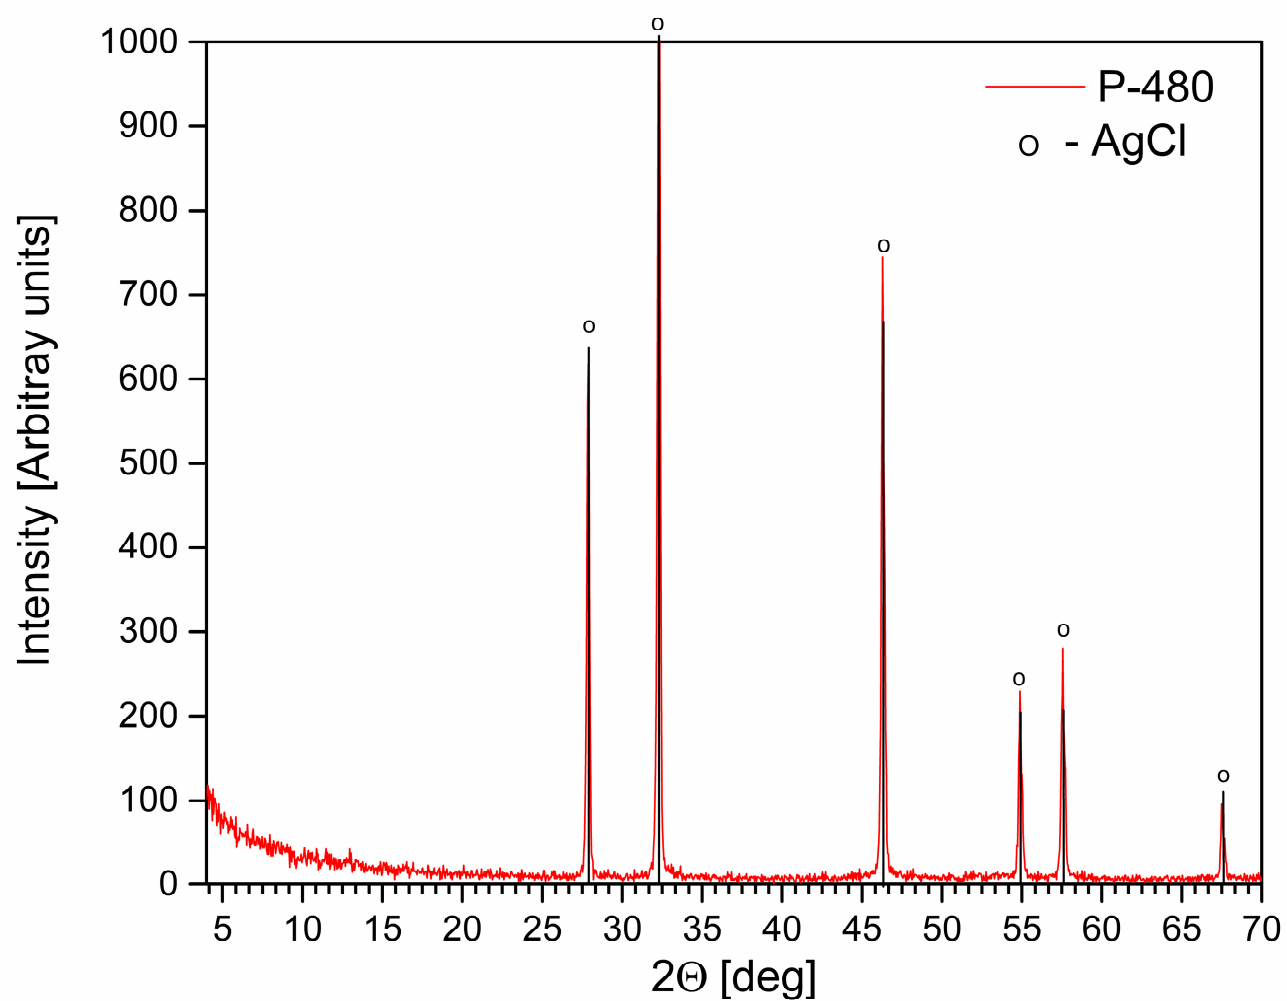

**Figure S7** The powder X-ray diffractogram of **P-480**



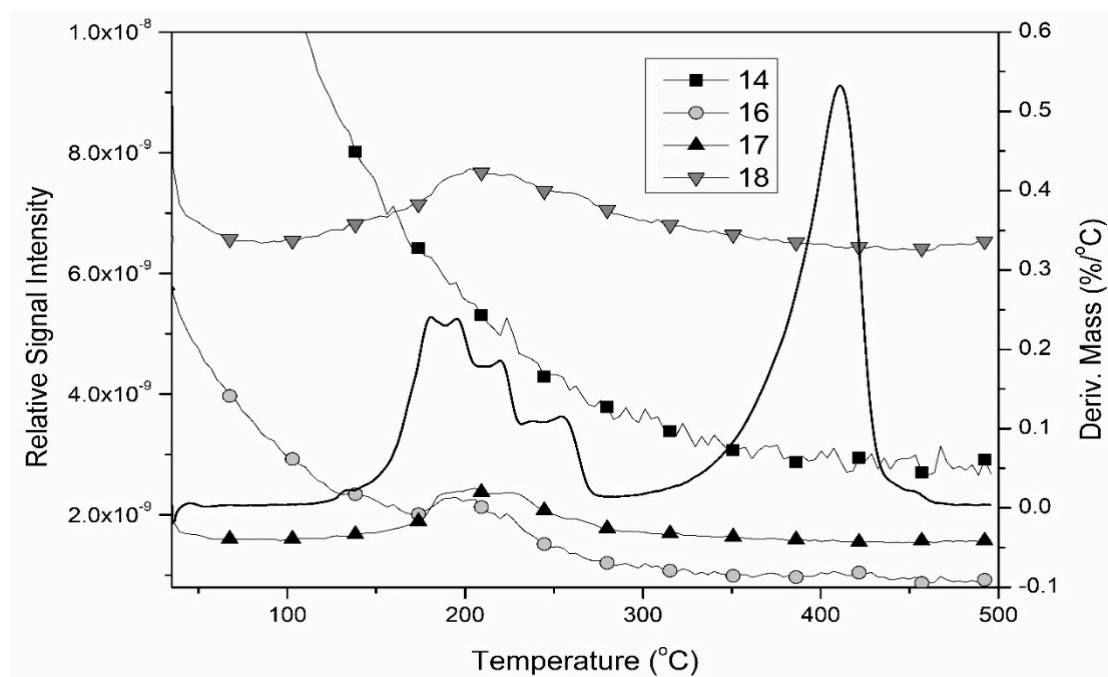

**Figure S8** TG-MS of compound **1** in inert atmosphere, formation of  $m/z=14$ ,  $m/z=16$ ,  $m/z=17$ ,  $m/z=18$ .

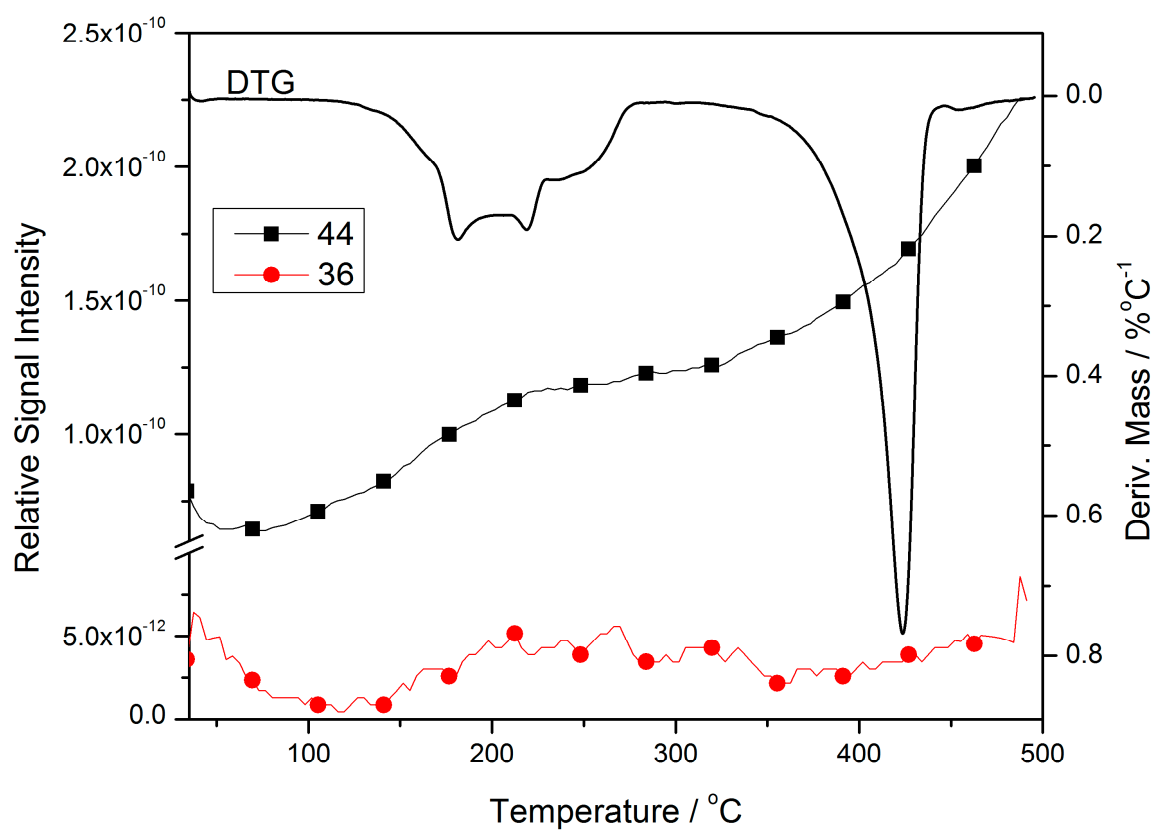

**Figure S9** TG-MS of compound **1** in air atmosphere, formation of m/z=44

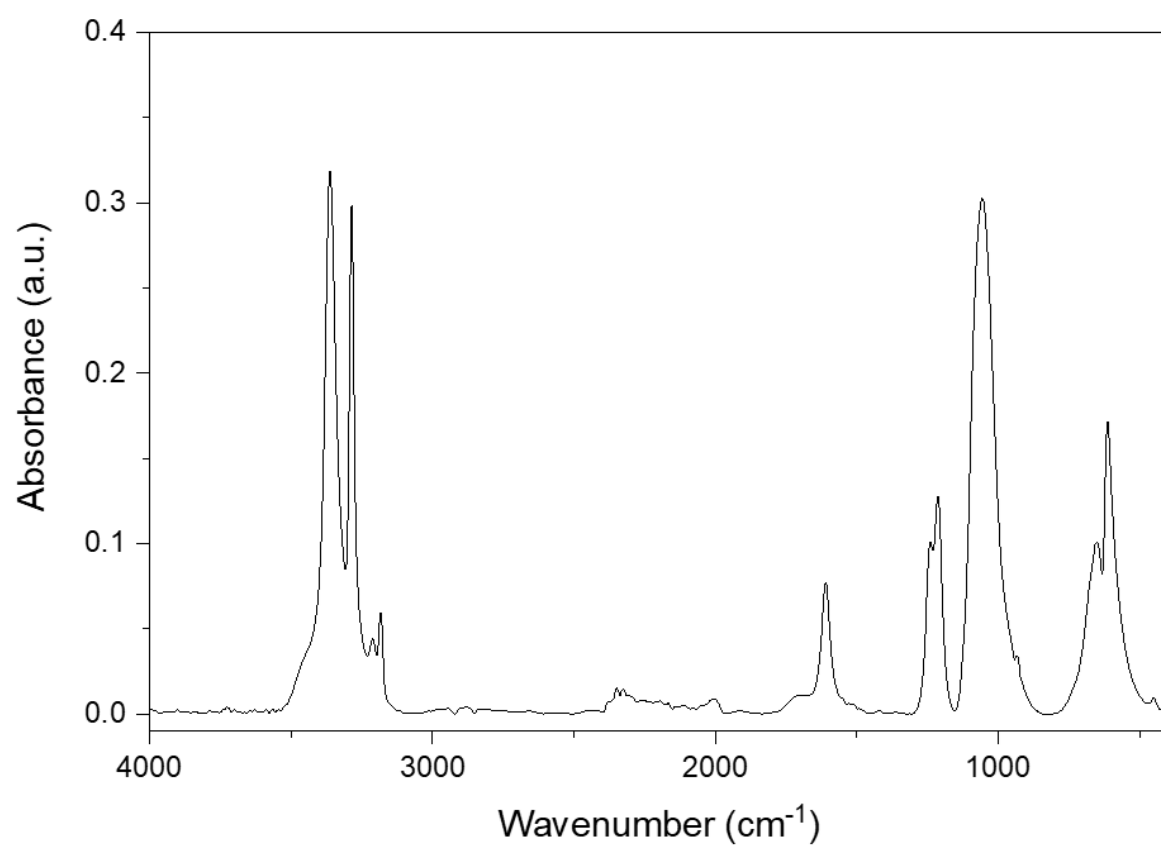

**Figure S10** IR spectrum of **I-240** intermediate

MTA KKKI - Bp.Hungary

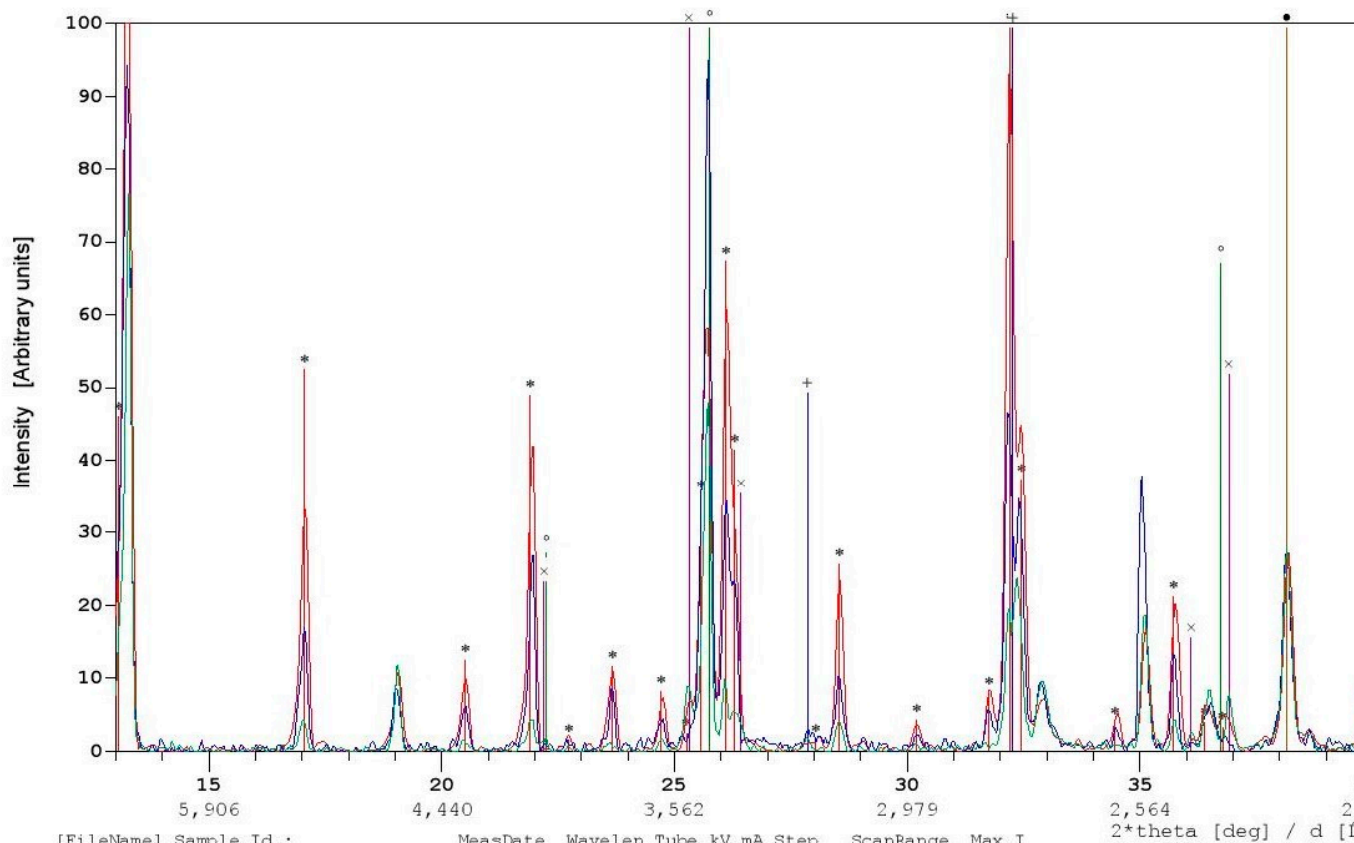

| [FileName] | Sample Id.:         | MeasDate   | Wavelen | Tube | kV | mA | Step | ScanRange | Max.I |
|------------|---------------------|------------|---------|------|----|----|------|-----------|-------|
| [aqam2pc-] | AgClO4/240C/1h/day2 | 02-25-2020 | 1,54186 | Cu   | 40 | 35 | 0,04 | 4,0-70,0  | 712   |
| [aqam2pc-] | AgClO4/240/1h/day3  | 02-26-2020 | 1,54186 | Cu   | 40 | 35 | 0,04 | 3,9-69,9  | 612   |
| [aqam2pc-] | AgCl 240c/1h/day3   | 03-02-2020 | 1,54186 | Cu   | 40 | 35 | 0,04 | 4,1-70,1  | 594   |

Reference patterns:

|          |      |                           |                |
|----------|------|---------------------------|----------------|
| *85-0194 | apch | Ag perchlorate hydrate    | Ag(ClO4) (H2O) |
| +31-1238 | AgCl | Chlorargyrite, syn        | AgCl           |
| °76-0083 | AClx | Silver perchlorate, cubic | AgClO4         |
| x83-1414 | Aqpc | Silver perchlorate, tetra | AgClO4         |
| ●04-0783 | Ag4F | Silver, syn               | Ag             |

**Figure S11** XRD of I-240 intermediate on storage for 3 days
